# Supplementary material for: Mapping Agricultural Lands: From Conventional to Regenerative
Source: MDPI journal article supplement (doi:10.3390/land11030437), 2022-03-17
Supplement: s1 [file s1]

## Supplemental S1

### Supplemental Materials for “Mapping Agricultural Lands: From Conventional to Regenerative”

Bergmann, L.; Chaves, L.F.; Betz, C.R.; Stein, S.; Wiedenfeld, B.; Wolf, A.; Wallace, R.G. Mapping Agricultural Lands: From Conventional to Regenerative. *Land* **2022**, *11*, 437. <https://doi.org/10.3390/land11030437>

#### Methods Supplement

We used the Python ecosystem around the libraries of *pandas* and *geopandas* to do most of the calculations and some visualizations; we also used QGIS for mapping; and we used QGIS, R, and ArcGIS Pro for some raster operations as needed.

#### *General considerations regarding data from the USDA 2017 Census of Agriculture*

Our general geospatial data file containing US county geometries (and the FIPS codes used to integrate data across sources) is drawn from the US Census under their TIGER/Line datasets [82]. We generally used the 2017 vin-tage, *tl\_2017\_us\_county.shp* available at <https://www.census.gov/geographies/mapping-files/time-series/geo/tiger-line-file.2017.html>. These data were generalized to simplify the boundaries (without modifying topology or losing features) for the purposes of display.

Most of the attribute data we use is drawn from the US Department of Agriculture *2017 Census of Agriculture* [52]. We used the full census dataset, downloadable in a file called `2017_cdqt_data.txt`.

If a county did not appear in the relevant part of the census data, we assumed the relevant value was zero.

If the county appears in the census but an entry was empty in the digital database file (which corresponds to a dash in the PDF/print version), we set the relevant value to zero.

If a value was “(D)” and thus disclosure was suppressed by the census for privacy reasons, we averaged the values for that variable among all directly adjacent counties with known values (according to the county geometries found in the US Census’s TIGER/Line data [82] from 2017). This only occurred in 15 counties nationwide, 2 of which fall within the 12-state study area (Milwaukee and Menominee in Wisconsin). Further, it only occurred for the variable *FarmSizeAvg\_Acres* (for explanation of this variable, see below). In these cases, we have added a double-asterisk \*\* to the names of the counties on our maps to show that there was an imputation in some of the data associated with that county.

Finally, this census variable is of use in calculating multiple other variables in our study, so we discuss it first:

NumberFarms

From USDA 2017 Agricultural Census Chapter 2, Table 1

With the Census Short Description: "FARM OPERATIONS - NUMBER OF OPERATIONS"

Notes: This variable was used to linearly rescale many of the variables, making them into ratios, especially in the numerator.

The following counties had 10 farms or fewer in USDA data (zeroes are counties with '-'/NA in the USDA data):

| STATE_FIPS | COUNTY_FIPS | COUNTY        | STATE         | NumberFarms |
|------------|-------------|---------------|---------------|-------------|
| 06         | 003         | Alpine        | CALIFORNIA    | 6           |
| 06         | 075         | San Francisco | CALIFORNIA    | 10          |
| 08         | 111         | San Juan      | COLORADO      | 0           |
| 26         | 083         | Keweenaw      | MICHIGAN      | 9           |
| 32         | 029         | Storey        | NEVADA        | 2           |
| 34         | 017         | Hudson        | NEW JERSEY    | 4           |
| 34         | 039         | Union         | NEW JERSEY    | 9           |
| 35         | 028         | Los Alamos    | NEW MEXICO    | 2           |
| 36         | 005         | Bronx         | NEW YORK      | 0           |
| 36         | 061         | New York      | NEW YORK      | 7           |
| 36         | 081         | Queens        | NEW YORK      | 4           |
| 36         | 085         | Richmond      | NEW YORK      | 6           |
| 48         | 301         | Loving        | TEXAS         | 8           |
| 51         | 013         | Arlington     | VIRGINIA      | 5           |
| 54         | 045         | Logan         | WEST VIRGINIA | 8           |
| 54         | 059         | Mingo         | WEST VIRGINIA | 8           |
| 55         | 078         | Menominee     | WISCONSIN     | 3           |

*Study variables: sources and processing*

*IntensiveGrazingRatio*

This is *IntensiveGrazing* / *NumberFarms* where *NumberFarms* is discussed above and *IntensiveGrazing* is found at:

USDA 2017 Agricultural Census Chapter 2, Table 43

...with the Census Short Description: "PRACTICES, ROTATIONAL OR MGMT INTENSIVE GRAZING - NUMBER OF OPERATIONS"

Note: 45 counties nationally do not have *IntensiveGrazing* data; these were set to 0's.

*SilvopastureRatio*

This is *Silvopasture* / *NumberFarms* where *Silvopasture* is found at:

USDA 2017 Agricultural Census Chapter 2, Table 43

...with the Census Short Description: "PRACTICES, ALLEY CROPPING & SILVAPASTURE - NUMBER OF OPERATIONS"

Note: 464 counties nationally do not have *Silvopasture* data; these were set to 0's.

*LivestockDiversity*

These are Shannon diversity indices for livestock-relevant variables that are used as if they are 'species' in the formula. The variables, which are introduced more thoroughly below, are: *CattleFarms*, *HogFarms*, *SheepFarms*, *GoatFarms*, *ChickenLayerFarms*, *ChickenBroilerFarms*, *TurkeyFarms*, and *BeeFarms*. Mathematically, if those variables are each different  $p_i$ :

$$LivestockDiversity = -\sum_i \left( \frac{p_i}{\sum_k p_k} \ln \frac{p_i}{\sum_k p_k} \right)$$

*CattleFarms*

USDA 2017 Agricultural Census Chapter 2, Table 11, Row 1

...with the Census Short Description: "CATTLE, INCL CALVES - OPERATIONS WITH INVENTORY"

Note: 16 counties nationally do not have *CattleFarms* data; these were set to 0's.

*HogFarms*

USDA 2017 Agricultural Census Chapter 2, Table 12, Row 1

...with the Census Short Description: "HOGS - OPERATIONS WITH INVENTORY"

Note: 179 counties nationally do not have *HogFarms* data; these were set to 0's.

*SheepFarms*

USDA 2017 Agricultural Census Chapter 2, Table 13, Row 1

...with the Census Short Description: "SHEEP, INCL LAMBS - OPERATIONS WITH INVENTORY"

Note: 163 counties nationally do not have *SheepFarms* data; these were set to 0's.

*GoatFarms*

USDA 2017 Agricultural Census Chapter 2, Table 14, Row 3

...with the Census Short Description: "GOATS - OPERATIONS WITH INVENTORY"

Note: 90 counties nationally do not have *GoatFarms* data; these were set to 0's.

*ChickenLayerFarms*

USDA 2017 Agricultural Census Chapter 2, Table 19, Row 3

...with the Census Short Description: "CHICKENS, LAYERS - OPERATIONS WITH INVENTORY"

Note: 38 counties nationally do not have *ChickenLayerFarms* data; these were set to 0's.

*ChickenBroilerFarms*

USDA 2017 Agricultural Census Chapter 2, Table 19, Row 20

...with the Census Short Description: "CHICKENS, BROILERS - OPERATIONS WITH INVENTORY"



Note: 426 counties nationally do not have *ChickenBroilerFarms* data; these were set to 0's.

### *TurkeyFarms*

USDA 2017 Agricultural Census Chapter 2, Table 19, Row 24

...with the Census Short Description: "TURKEYS - OPERATIONS WITH INVENTORY"

Note: 712 counties nationally do not have *TurkeyFarms* data; these were set to 0's.

### *BeeFarms*

USDA 2017 Agricultural Census Chapter 2, Table 21

...with the Census Short Description: "HONEY, BEE COLONIES - OPERATIONS WITH INVENTORY"

Note: 231 counties nationally do not have *BeeFarms* data; these were set to 0's.

### *ConservationEasementsRatio*

This is *ConservationEasements* / *NumberFarms* where *ConservationEasements* is found at:

USDA 2017 Agricultural Census Chapter 2

...with the Census Short Description: "PRACTICES, LAND USE, CONSERVATION EASEMENT - NUMBER OF OPERATIONS"

Note: 213 counties nationally do not have *ConservationEasements* data; these were set to 0's.

### *CoverCropsRatio*

This is *CoverCrops* / *NumberFarms* where *CoverCrops* is found at:

USDA 2017 Agricultural Census Chapter 2, Table 41

...with the Census Short Description: "PRACTICES, LAND USE, CROPLAND, COVER CROP PLANTED, (EXCL CRP) - NUMBER OF OPERATIONS"

Note: 61 counties nationally do not have *CoverCrops* data; these were set to 0's.

### NoTillRatio

This is *NoTill* / *NumberFarms* where *NoTill* is found at:

USDA 2017 Agricultural Census Chapter 2, Table 41

...with the Census Short Description: "PRACTICES, LAND USE, CROPLAND, CONSERVATION TILLAGE, NO-TILL - NUMBER OF OPERATIONS"

Note: 53 counties nationally do not have *NoTill* data; these were set to 0's.

### CropDiversity

The *CropDiversity* is, like the *LivestockDiversity*, a Shannon diversity index (see above for formula). Unlike *LivestockDiversity*, it is not calculated as if individual species in the entropy formula were solely each different census counts of farms with various sorts of livestock. Instead, there are four 'species' ( $p_i$ ) that go into the entropy formula, two of which, *GrainFarmsTotal* and *ForageFarmsTotal*, are the sums of other variables (*GrainFarmsTotal* is the sum of *MaizeFarms*, *OatsFarms*, *SoybeanFarms*, *WheatFarms*, and *WildRiceFarms*. *ForageFarmsTotal* is the sum of *HayFarms* and *CornSilageFarms*.) The remaining two variables inputted into the entropy formula are *VegetableFieldFarms* and *FruitFarms*. These variables are defined below.

#### *MaizeFarms*

USDA 2017 Agricultural Census Chapter 2, Table 25

...with the Census Short Description: "CORN, GRAIN - OPERATIONS WITH AREA HARVESTED"

Note: 436 counties nationally do not have *MaizeFarms* data; these were set to 0's.

#### *OatsFarms*

USDA 2017 Agricultural Census Chapter 2, Table 25

...with the Census Short Description: "OATS - OPERATIONS WITH AREA HARVESTED"

Note: 1470 counties nationally do not have *OatsFarms* data; these were set to 0's.

*SoybeanFarms*

USDA 2017 Agricultural Census Chapter 2, Table 25

...with the Census Short Description: "SOYBEANS - OPERATIONS WITH AREA HARVESTED"

Note: 879 counties nationally do not have *SoybeanFarms* data; these were set to 0's.

*WheatFarms*

USDA 2017 Agricultural Census Chapter 2, Table 25

...with the Census Short Description: "WHEAT - OPERATIONS WITH AREA HARVESTED"

Note: 707 counties nationally do not have *WheatFarms* data; these were set to 0's.

*WildRiceFarms*

USDA 2017 Agricultural Census Chapter 2, Table 25

...with the Census Short Description: "WILD RICE - OPERATIONS WITH AREA HARVESTED"

Note: 3054 counties nationally do not have *WildRiceFarms* data; these were set to 0's.

*HayFarms*

USDA 2017 Agricultural Census Chapter 2, Table 26

...with the Census Short Description: "HAY & HAYLAGE - OPERATIONS WITH AREA HARVESTED"

Note: In the PDF, described as for "FORAGE -LAND USED FOR ALL HAYAND HAYLAGE, GRASS SILAGE,AND GREENCHOP"

Note: 32 counties nationally do not have *HayFarms* data; these were set to 0's.

*CornSilageFarms*

USDA 2017 Agricultural Census Chapter 2, Table 26

...with the Census Short Description: "CORN, SILAGE - OPERATIONS WITH AREA HARVESTED"

Note: 948 counties nationally do not have *CornSilageFarms* data; these were set to 0's.

#### *VegetableFieldFarms*

USDA 2017 Agricultural Census Chapter 2, Table 29

...with the Census Short Description: "VEGETABLE TOTALS, IN THE OPEN - OPERATIONS WITH AREA HARVESTED"

Note: In the PDF, noted as farms with Vegetables, Potatoes, Melons...

Note: 261 counties nationally do not have *VegetableFieldFarms* data; these were set to 0's.

#### *FruitFarms*

USDA 2017 Agricultural Census Chapter 2, Table 31

...with the Census Short Description: "NON-CITRUS TOTALS, (EXCL BERRIES) - OPERATIONS WITH AREA BEARING & NON-BEARING"

Note: 434 counties nationally do not have *FruitFarms* data; these were set to 0's.

#### *LocalDirectSalesFarmsRatio*

This is *LocalDirectSalesFarms* / *NumberFarms* where *LocalDirectSalesFarms* is found at:

USDA 2017 Agricultural Census Chapter 2, Table 2

...with the Census Short Description: "COMMODITY TOTALS, INCL VALUE-ADDED, RETAIL, DIRECTLY MARKETED, HUMAN CONSUMPTION - OPERATIONS WITH SALES"

Note: The full census publication describes this as follows, "Food marketing practices. This is a new section for 2017. This section consists of sales of edible agricultural products that are both produced and sold by the operation directly to consumers (farmers markets, on farm stores or farm stand, roadside stands or stores, u-pick, CSA, online marketplaces, etc.)" [52] (B-10).

Note: 115 counties nationally do not have *LocalDirectSalesFarms* data; these were set to 0's.

Food Flows (called Food Flow Over400mi KTxKm)

Food flows over 400 miles (644 km) are calculated from the food flow database estimated by Lin et al. in 2019 [65]. We dropped all food flows between counties whose centroids are less than 400 miles apart; we used a publicly available distance matrix [81]. For a given county, then, we find its total food flow by multiplying the distances to each destination county it exports food to by the mass of those flows, adding them all up to yield a single number. Or, more formally:

$$foodflow_i^{nonlocal} = \sum_j H(d_{ij} - 400) foodflow_{ij} d_{ij}$$

...where  $foodflow_i^{nonlocal}$  is the total foodflow from county  $i$  measured in kiloton-kilometers;  $foodflow_{ij}$  is the food flow from county  $i$  to county  $j$  (from the 'total' column in Lin et al.) measured in kilograms;  $d_{ij}$  is the great circle distance between county  $i$  and county  $j$  measured in miles; and  $H(x)$  is the Heaviside step function such that where the distance between county  $i$  and county  $j$  is greater than 400 miles the function evaluates to 1 and associated terms are counted into the sum, otherwise, for distances less than 400 miles, the function evaluates to 0 and the term does not contribute to this measure of nonlocal food flows.

Agricultural Methane (named CH4 per km2 ag area)

Our agricultural methane emissions data comes from Maasakkars et al. 2016 [67] in the form of several  $0.1 \times 0.1$  degree raster layers modeling emissions associated with:

GEPA\_Annualemissions\_4F\_Field\_Burning  
 GEPA\_Annualemissions\_4C\_Rice\_Cultivation  
 GEPA\_Annualemissions\_4B\_Manure\_Management  
 GEPA\_Annualemissions\_4A\_Enteric\_Fermentation

Each of these rasters has values that have "units=moleccm-2s-1" (seen in the NetCDF metadata) which Maasakkars confirms (pers. comm.) is interpreted as "molecules of methane per squared centimeter per second."

Using raster algebra, we added up those grids:

Ag-Methane-Fluxes-Sum.tif =  
 "GEPA\_Annualemissions\_4F\_Field\_Burning.tif" +  
 "GEPA\_Annualemissions\_4C\_Rice\_Cultivation.tif" +  
 "GEPA\_Annualemissions\_4B\_Manure\_Management.tif" +  
 "GEPA\_Annualemissions\_4A\_Enteric\_Fermentation.tif"

In order to aggregate fluxes to county level, given that the length of a degree of longitude can be 35% different between latitudes 30N and 50N, one needs to not assume each  $0.1 \times 0.1$  degree square is the same size throughout

the US. Instead, the methane flux data raster needs to be supplemented by a raster of the same cell sizes/alignments where the cell values are the areas of those cells in  $\text{cm}^2$ . To approximate the area of a 0.1 degree x 0.1 degree “square” at longitude X and latitude Y, we used the *area()* command in the R *raster* library, such that, “values represent the size of the cell in  $\text{km}^2$ .” Thus far, raster areas are in  $\text{km}^2$  and methane data is in units of “molecules of methane per squared centimeter per second”

We then derive a methane-grid.tif with units of moles/second for each cell. The calculation runs as follows:

```
methane-grid.tif =
  "methane-grid-area.tif" *
  "Ag-Methane-Fluxes-Sum.tif" /
  (6.02214076 * 10**23) *
  1000 * 1000 * 100 * 100
...as there are 6.02214076 * 10^23 molecules in a mole and there are 1000
* 100 cm in a kilometer.
```

Next, we aggregated the methane fluxes up from having the spatial extent of individual 0.1 x 0.1 degree cells into being county by county. For this, we used ArcGIS Pro’s “Zonal Statistics as Table” tool, chopping and summing up *methane-grid.tif* within the boundaries of *tl\_2017\_us\_county.shp* (mentioned at the beginning of the Supplement) to create our county flux result, a table in which agricultural methane flow in units of moles/second appear under a column.

These fluxes are calculated per county, but counties vary in area, and two counties of roughly the same absolute area may differ in their areas given over to agriculture (at an extreme, some counties have large urban or lake areas to their land.) As such, we attempt to find a relative measure of the intensity of the agricultural emissions per county by dividing the emissions by a relevant area. We chose the area in each county given by the National Land Cover Database 2016 [62] under classifications 71, 81, or 82, as they all included agriculture uses. These classes are described as follows at <https://www.mrlc.gov/data/legends/national-land-cover-database-2016-nlcd2016-legend> :

71 - “Grassland/Herbaceous - areas dominated by graminoid or herbaceous vegetation, generally greater than 80% of total vegetation. These areas are not subject to intensive management such as tilling, but can be utilized for grazing.”

81 - “Pasture/Hay - areas of grasses, legumes, or grass-legume mixtures planted for livestock grazing or the production of seed or hay crops, typically on a perennial cycle. Pasture/hay vegetation accounts for greater than 20% of total vegetation.”

82 - “Cultivated Crops - areas used for the production of annual crops, such as corn, soybeans, vegetables, tobacco, and cotton, and also perennial woody crops such as orchards and vineyards. Crop vegetation accounts for

greater than 20% of total vegetation. This class also includes all land being actively tilled.”

NLCD 2016 pixels each measure 30m by 30m and the areas under the above classes within each county were summarized using ArcGIS Pro.

From there, to get the final agricultural methane variables (agricultural methane flux per square agricultural kilometer), we divide our methane fluxes per county by the agricultural areas per county and call the results *CH4\_per\_km2\_ag\_area*.

#### *PM2.5\_nonurban*

Our *PM2.5\_nonurban* data is derived from calculations on WHO DIMAQ data [61]. DIMAQ’s webpage notes: “Estimation of global health risks from exposure to ambient air pollution requires a comprehensive set of air pollution exposure data covering all inhabited areas. The Data Integration Model for Air Quality (DIMAQ) has produced estimates based on data from ground measurements together with information from other sources including data from satellite retrievals of aerosol optical depth and chemical transport models. It provides estimates of annual exposures to PM2.5 at high spatial resolution ( $0.1^\circ \times 0.1^\circ$ , which equates to approximately 11x11km at the equator) globally. The sources of data include: Ground measurements from 9690 monitoring locations around the world, satellite remote sensing; population estimates; topography; and information on local monitoring networks and measures of specific contributors of air pollution from chemical transport models. Within DIMAQ, data from these sources are calibrated with ground measurements. The model provides estimates of air quality, expressed in terms of median concentrations of PM2.5, for all regions of the world, including areas in which PM2.5 monitoring is not available.”

As described in the main text, our variable *PM2.5\_nonurban* approximates the average PM2.5 levels associated with agricultural activities and lands. WHO’s DIMAQ model data from 2016 arrives as point data. We convert that into a gridded (vector, not raster) dataset where the grid cells are centered on the individual DIMAQ points and the grid cells take on the values at the points. This polygon grid of PM2.5 values has cells with resolutions of 0.1 degree x 0.1 degree. Unlike other variables, this data is quite general and not at all limited to phenomena associated with agricultural lands. In contrast to the agricultural methane data above, this data includes PM2.5 emitted within urban contexts, for example. As such, though it is far from a perfect estimation of PM2.5 connected to agriculture, we nonetheless exclude from our PM2.5 average for counties those areas in counties that are themselves more ‘developed’ in an urbanized sense.

We find our ‘urbanized’ areas by processing the 2016 NLCD land cover database ( <https://www.mrlc.gov/data/nlcd-2016-land-cover-conus> ). This is a 30m resolution raster. We reclassified the urbanized pixels vs non, then aggregated up to 4x4 pixels, and selected those pixels that had more than 50%

of the resulting area as urbanized to become the 'urban' areas. We converted the results to vector polygons. The above operations were carried out in ArcGIS Pro, given the file format the data arrived in.

These urbanized polygons are then removed (via GIS overlay operations) from the pm2.5 grid polygons, which removes not only whole grid cells but also removes complex fractional areas from within cells. As such, we are able to calculate the average non-urban PM2.5 for each county by first cutting (via a GIS overlay intersect operation) the non-urban pm2.5 polygon data into datasets corresponding to each different county and then by taking the weighted average of the PM2.5 measurements in the cells remaining within each county, weighting those averages by the remaining areas of those remaining cells in each county.

#### FarmSizeAvg\_Acres

USDA 2017 Agricultural Census Chapter 2, Table 1

...with the Census Short Description: "FARM OPERATIONS - AREA OPERATED, MEASURED IN ACRES / OPERATION"

Counties with suppressed FarmSizeAvg\_Acres:

| GEOID | STATE_FIPS_CODE | COUNTY_CODE | STATE_NAME | COUNTY_NAME | FarmSizeAvg_Acres |
|-------|-----------------|-------------|------------|-------------|-------------------|
| 32003 | 32              | 003         | NEVADA     | CLARK       | (D)               |
| 32009 | 32              | 009         | NEVADA     | ESMERALDA   | (D)               |
| 12019 | 12              | 019         | FLORIDA    | CLAY        | (D)               |
| 32021 | 32              | 021         | NEVADA     | MINERAL     | (D)               |
| 32029 | 32              | 029         | NEVADA     | STOREY      | (D)               |
| 35028 | 35              | 028         | NEW MEXICO | LOS ALAMOS  | (D)               |
| 12037 | 12              | 037         | FLORIDA    | FRANKLIN    | (D)               |
| 12045 | 12              | 045         | FLORIDA    | GULF        | (D)               |
| 35049 | 35              | 049         | NEW MEXICO | SANTA FE    | (D)               |
| 55078 | 55              | 078         | WISCONSIN  | MENOMINEE   | (D)               |
| 36081 | 36              | 081         | NEW YORK   | QUEENS      | (D)               |
| 55079 | 55              | 079         | WISCONSIN  | MILWAUKEE   | (D)               |
| 36085 | 36              | 085         | NEW YORK   | RICHMOND    | (D)               |

As described at the beginning of this Supplement, for each of the above counties with suppressed FarmSizeAvg\_Acres, a value was imputed:



| GEOID | STATE_FIPS_CODE | COUNTY_CODE | STATE_NAME | COUNTY_NAME | FarmSizeAvg_Acres |
|-------|-----------------|-------------|------------|-------------|-------------------|
| 32003 | 32              | 003         | NEVADA     | CLARK       | 1326.2            |
| 32009 | 32              | 009         | NEVADA     | ESMERALDA   | 1647              |
| 12019 | 12              | 019         | FLORIDA    | CLAY        | 118               |
| 32021 | 32              | 021         | NEVADA     | MINERAL     | 858               |
| 32029 | 32              | 029         | NEVADA     | STOREY      | 686               |
| 35028 | 35              | 028         | NEW MEXICO | LOS ALAMOS  | 862.5             |
| 12037 | 12              | 037         | FLORIDA    | FRANKLIN    | 213               |
| 12045 | 12              | 045         | FLORIDA    | GULF        | 330.5             |
| 35049 | 35              | 049         | NEW MEXICO | SANTA FE    | 1173.36           |
| 55078 | 55              | 078         | WISCONSIN  | MENOMINEE   | 238               |
| 36081 | 36              | 081         | NEW YORK   | QUEENS      | 19.5              |
| 55079 | 55              | 079         | WISCONSIN  | MILWAUKEE   | 178.333           |
| 36085 | 36              | 085         | NEW YORK   | RICHMOND    | 26.0833           |

When data for these counties is mapped, these county names have an asterisk placed by them.

#### PesticideRatio

This is a variable constructed from the following ratio:

$$PesticideRatio = \frac{(ChemOtherFarms + ChemFungicideFarms + ChemNematicideFarms + ChemInsecticideFarms + ChemHerbicideFarms)}{NumberFarms}$$

...where the variables are defined as follows:

#### *ChemOtherFarms*

USDA 2017 Agricultural Census Chapter 2, Table 40

...with the Census Short Description: "AG LAND - OPERATIONS WITH TREATED"

...and the Domain Cat Description: "CHEMICAL, OTHER: (TOTAL)"

Note: In the PDF, described as "Chemicals used to control growth, thin fruit, ripen, or defoliate farms"

Note: 543 counties nationally do not have *ChemOtherFarms* data; these were set to 0's.

*ChemFungicideFarms*

USDA 2017 Agricultural Census Chapter 2, Table 40

...with the Census Short Description: "AG LAND - OPERATIONS WITH TREATED"

...and the Domain Cat Description: "CHEMICAL, FUNGICIDE: (TOTAL)"

Note: In the PDF, described as "Diseases in crops and orchards farms"

Note: 194 counties nationally do not have *ChemFungicideFarms* data; these were set to 0's.

*ChemNematicideFarms*

USDA 2017 Agricultural Census Chapter 2, Table 40

...with the Census Short Description: "AG LAND - OPERATIONS WITH TREATED"

...and the Domain Cat Description: "CHEMICAL, INSECTICIDE: (NEMAT-ICIDES)"

Note: In the PDF, described as for "Nematodes"

Note: 552 counties nationally do not have *ChemNematicideFarms* data; these were set to 0's.

*ChemInsecticideFarms*

USDA 2017 Agricultural Census Chapter 2, Table 40

...with the Census Short Description: "AG LAND - OPERATIONS WITH TREATED"

...and the Domain Cat Description: "CHEMICAL, INSECTICIDE: (EXCL NE-MATICIDES)"

Note: In the PDF, described as for "Insects"

Note: 31 counties nationally do not have *ChemInsecticideFarms* data; these were set to 0's.

*ChemHerbicideFarms*

USDA 2017 Agricultural Census Chapter 2, Table 40

...with the Census Short Description: "AG LAND - OPERATIONS WITH TREATED"

...and the Domain Cat Description: "CHEMICAL, HERBICIDE: (TOTAL)"

Note: In the PDF, described as for "Weeds, grass, or brush"

Note: 21 counties nationally do not have *ChemHerbicideFarms* data; these were set to 0's.

## Additional Clustering Results

Below are example clustering results from  $k$ -means for  $k=3$  to  $k=9$ . Please note that the numbering and coloring of clusters is arbitrary and therefore colors or numbers shared between different Figures are coincidence, not meaningful.

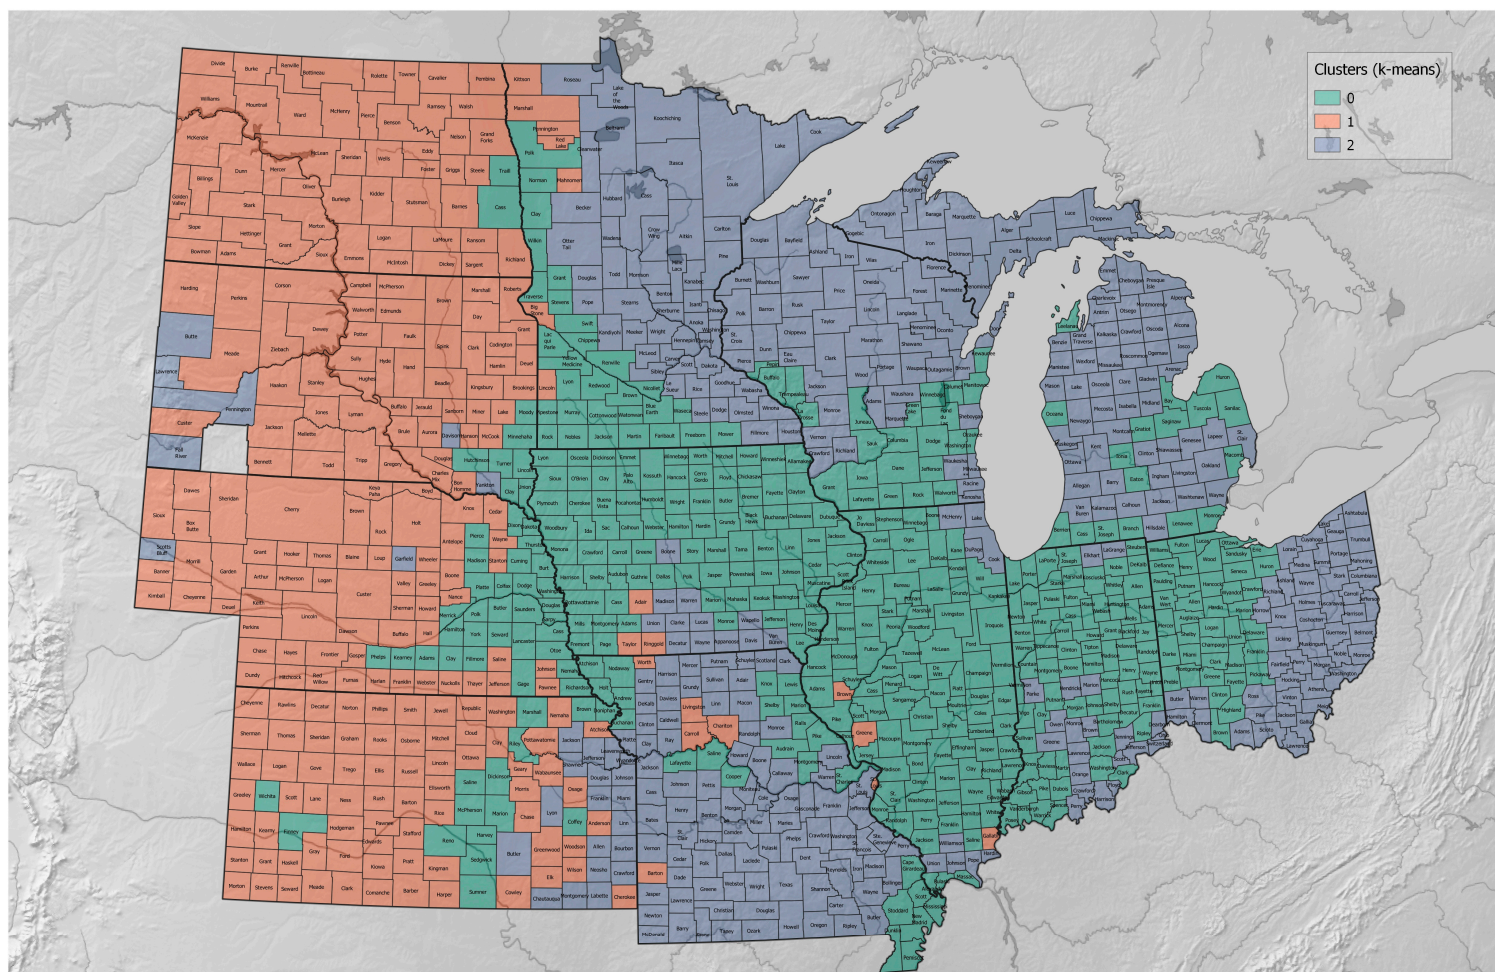

Figure S1. Clustering by  $k$ -means ( $k=3$  clusters).



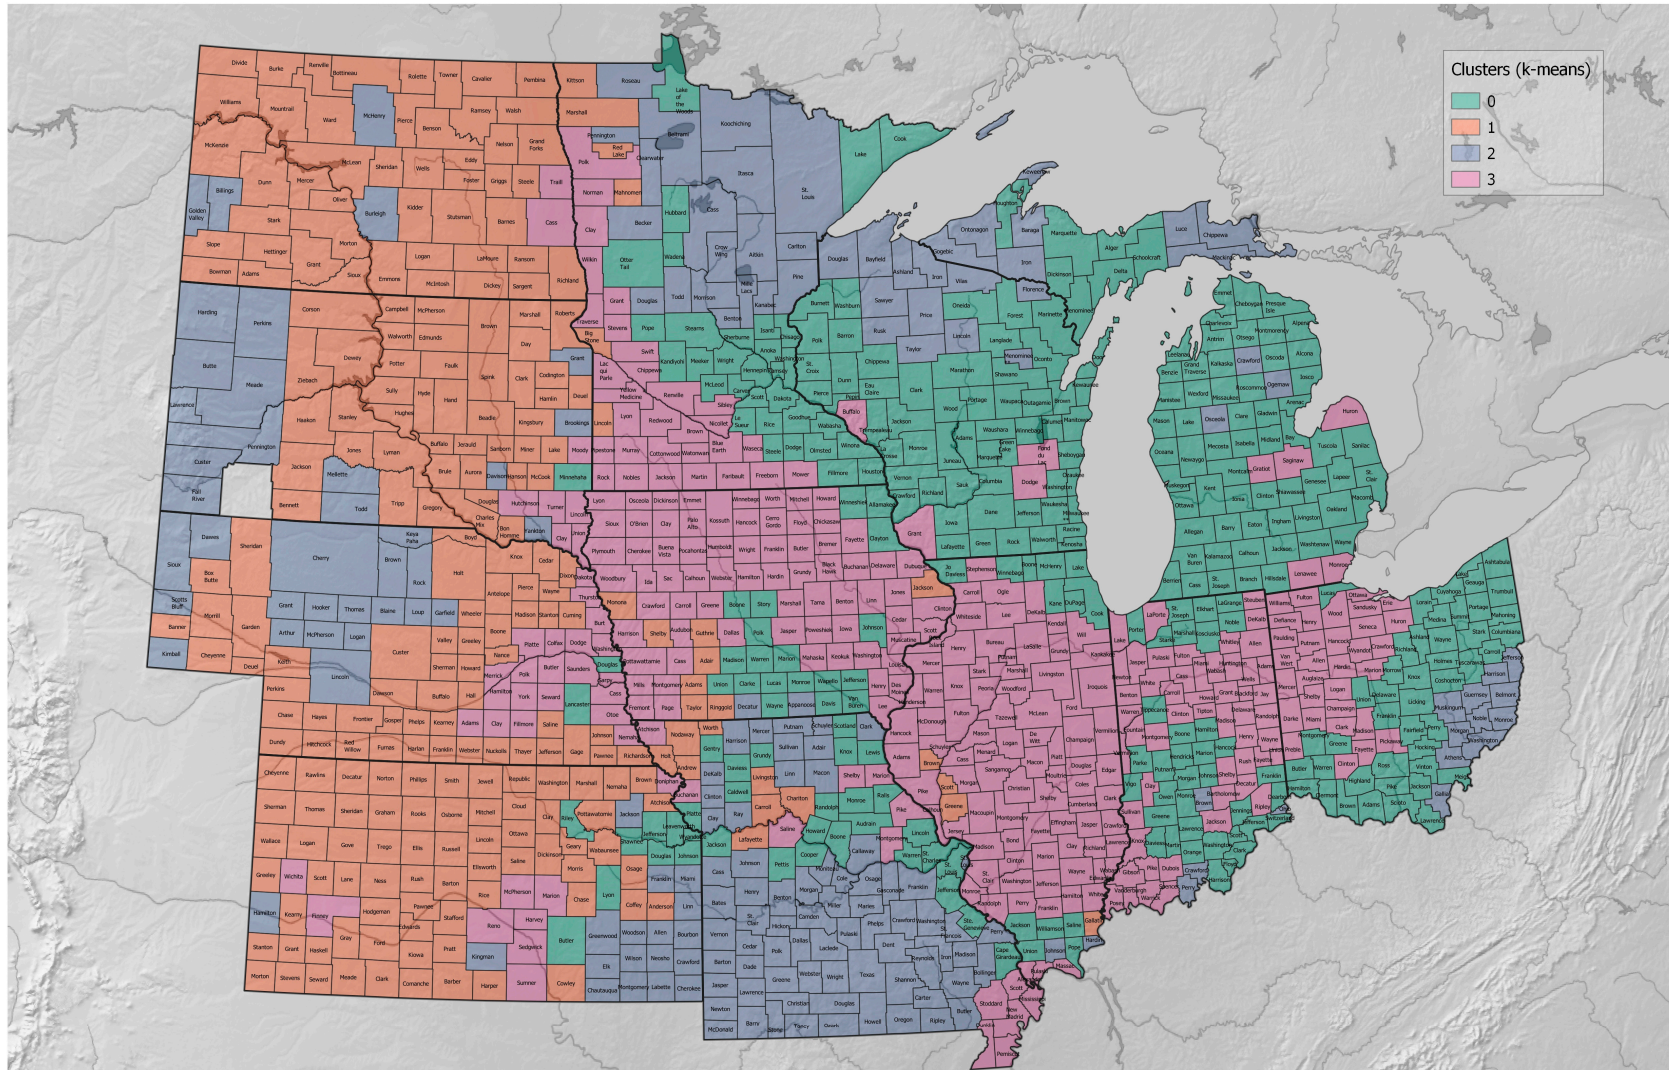

Figure S2. Clustering by  $k$ -means ( $k=4$  clusters).



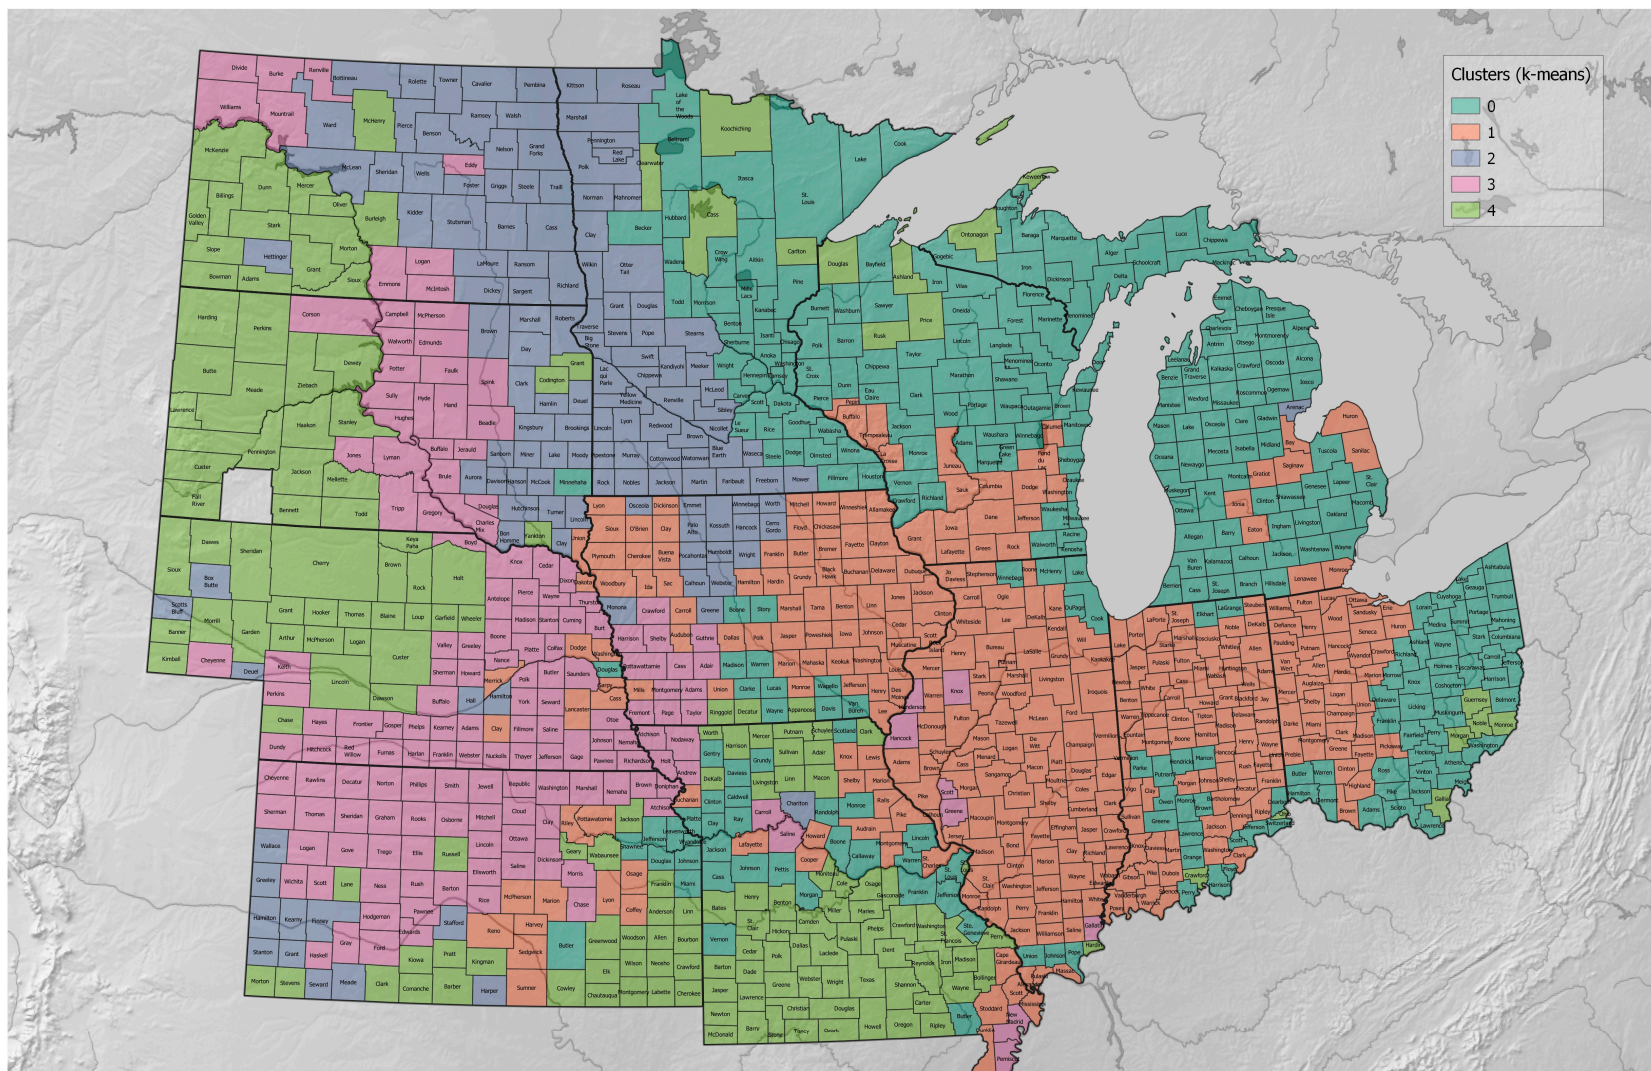

Figure S3. Clustering by  $k$ -means ( $k=5$  clusters).



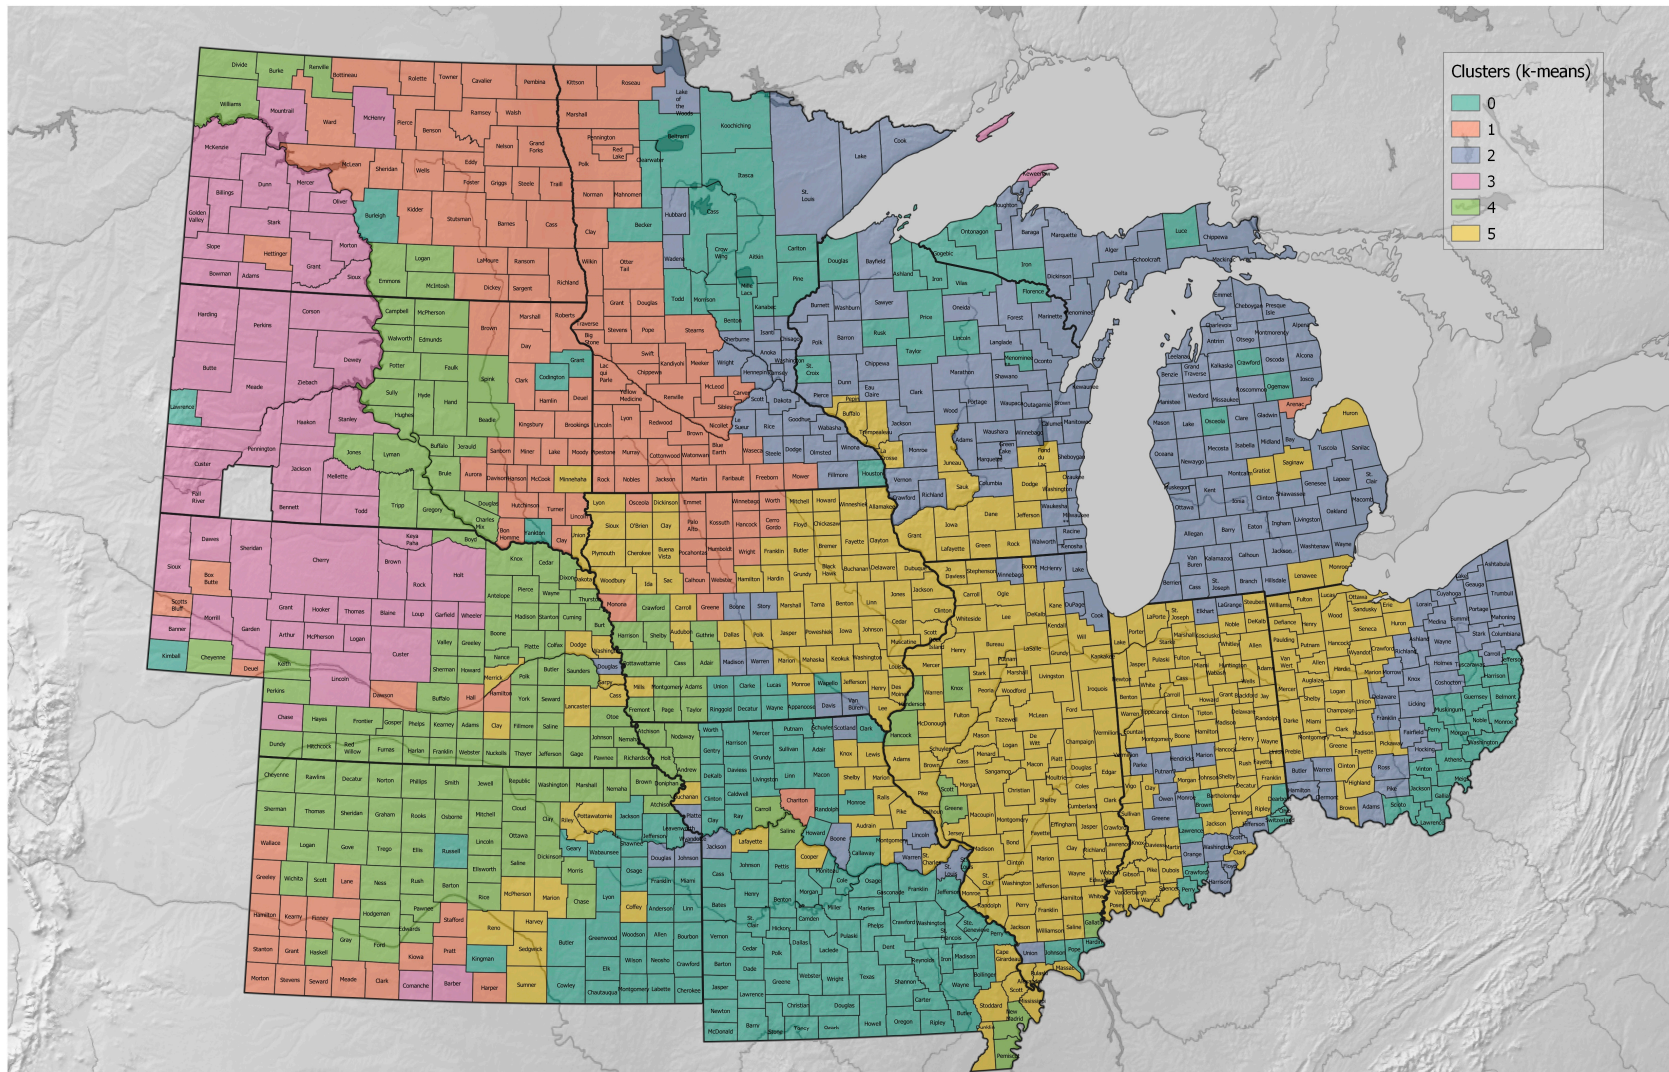

Figure S4. Clustering by  $k$ -means ( $k=6$  clusters).



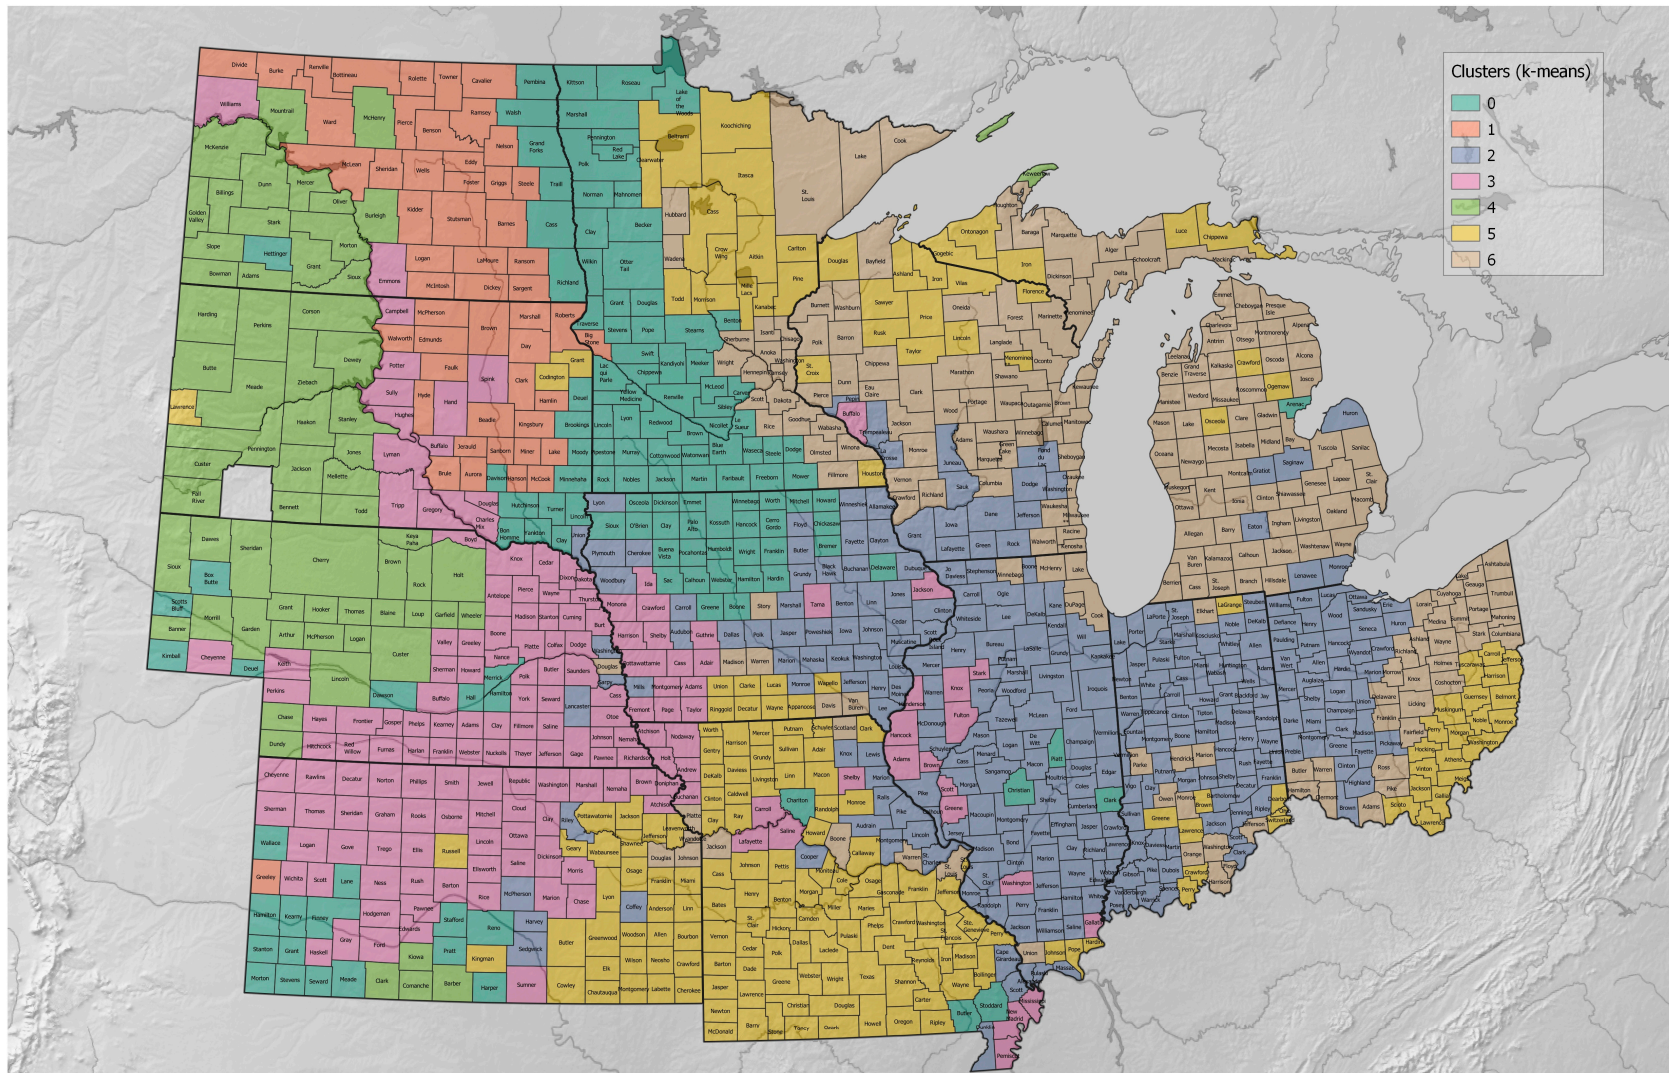

Figure S5. Clustering by  $k$ -means ( $k=7$  clusters).



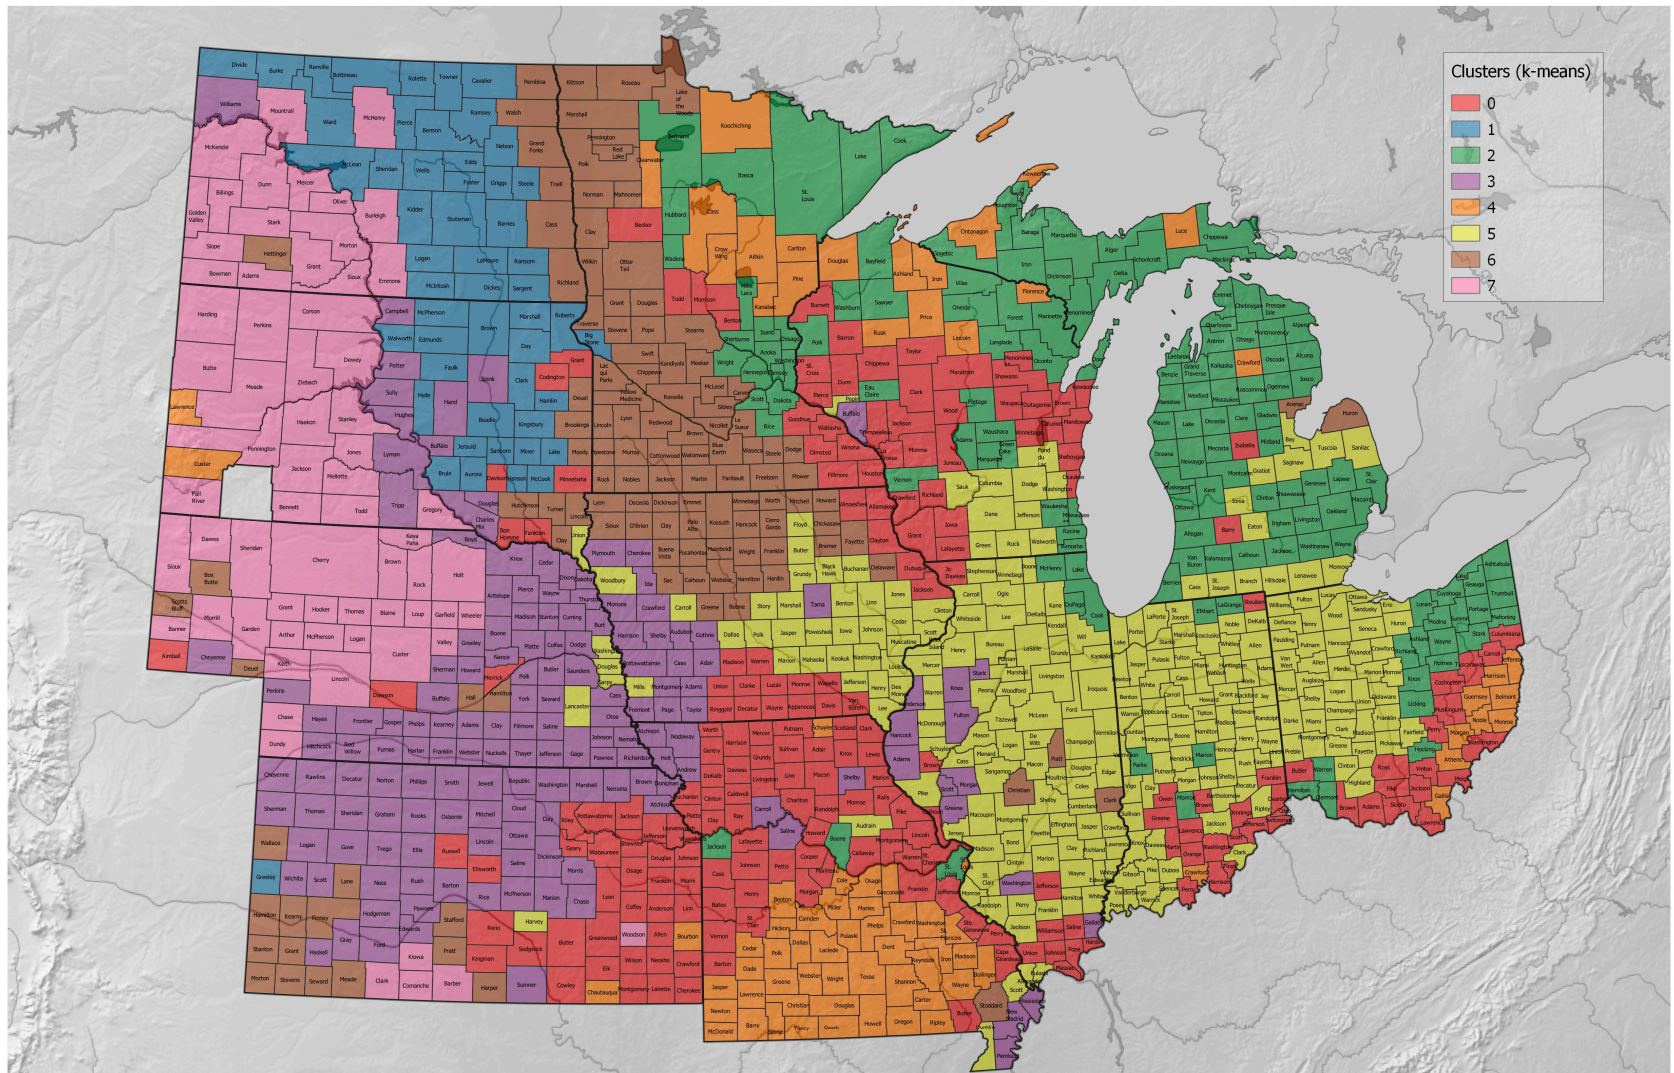

Figure S6. Clustering by  $k$ -means ( $k=8$  clusters).



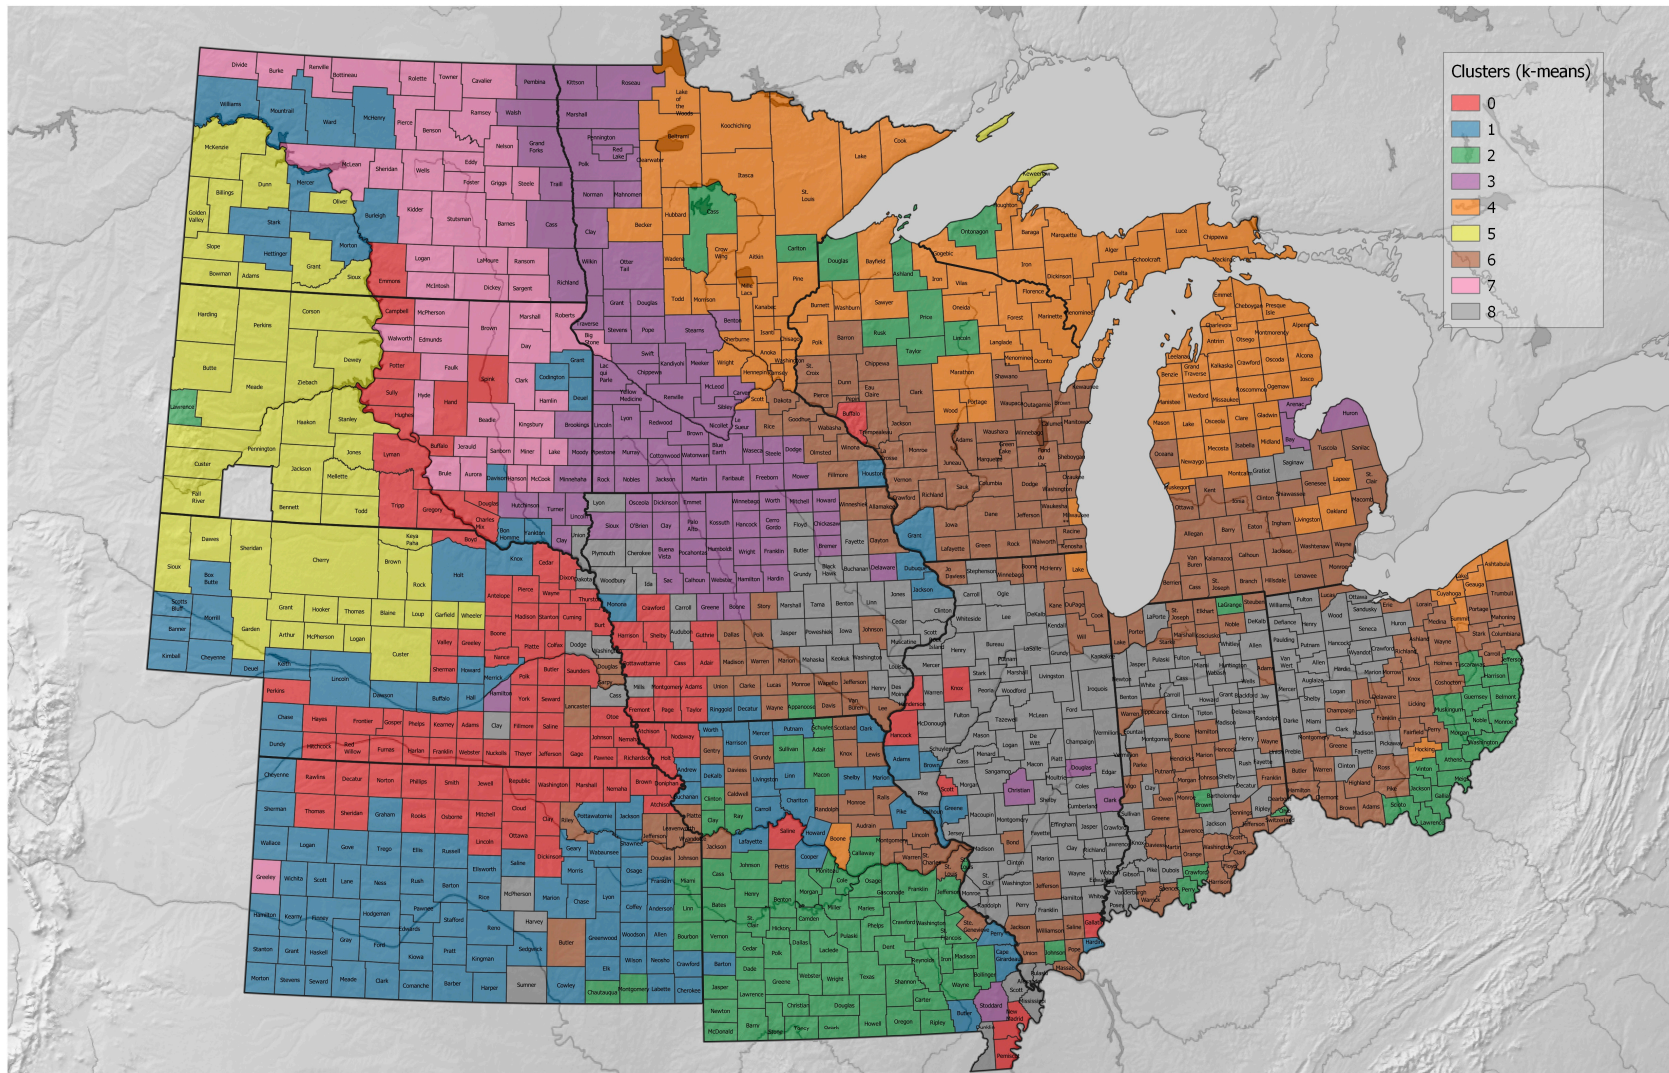

**Figure S7.** Clustering by  $k$ -means ( $k=9$  clusters) [Figure included for convenience; same as Figure 4 in the article main text.].
